# Supplementary material
Source: PubMed Central journal article supplement (PMC3687022)

**Supplementary Material for:**

**Human lung epithelial cells progressed to malignancy through specific oncogenic  
manipulations**

Mitsuo Sato<sup>\*1,10</sup>, Jill E. Larsen<sup>\*1</sup>, Woonchang Lee<sup>1,11</sup>, Han Sun<sup>2</sup>, David S. Shames<sup>1,12</sup>, Maithili P. Dalvi<sup>1</sup>, Ruben D. Ramirez<sup>1,4,13</sup>, Hao Tang<sup>2</sup>, J. Michael DiMaio<sup>5</sup>, Boning Gao<sup>1,3</sup>, Yang Xie<sup>2</sup>, Ignacio I. Wistuba<sup>8</sup>, Adi F. Gazdar<sup>1,6</sup>, Jerry W. Shay<sup>7,9</sup> and John D. Minna<sup>1,3,4</sup>

\*These authors contributed equally.

## Supplementary Methods

### *Microarray analysis*

RNA was isolated using RNeasy mini kit (QIAGEN, Valencia, CA) and quality was analyzed using an Agilent 2100 Bioanalyzer (Agilent Technologies Inc., Santa Clara, CA). Samples were labeled and hybridized to Illumina HumanHT-12 v4 Expression BeadChips (Illumina Inc., San Diego, CA) (containing 47,231 probes (28,688 unique genes)) following the manufacturer's guidelines. Microarray analysis was performed using in-house Visual Basic software MATRIX V1.483. Functional analysis of differentially expressed genes was performed using Ingenuity Pathway Analysis (IPA) (Ingenuity Systems, Inc. Redwood City, CA). The data discussed in this publication have been made available in the National Center for Biotechnology Information's Gene Expression Omnibus (GEO) public repository (<http://www.ncbi.nlm.nih.gov/geo/>) and are accessible through GEO Series accession number GSE40828.

The predictive ability of the soft agar gene signature was tested using two independent mRNA microarray lung tumor datasets; 209 primary lung adenocarcinomas and squamous cell carcinomas (SPORE dataset) (GSE41271) and 442 primary lung adenocarcinomas (Director's Challenge Consortium dataset) (18). Microarrays for the SPORE dataset were performed as described above using the Illumina HumanWG6 v3 Expression BeadChips (Illumina Inc., San Diego, CA) (containing 48,803 probes (29,346 unique genes)) following the manufacturer's guidelines. Raw cel data from the Director's Challenge Consortium dataset(18) was download from the NCI caArray Database (<https://array.nci.nih.gov/caarray/home.action>) and preprocessed by the Robust Multiarray Average (RMA) algorithm (19) and quantile-quantile normalization.

All gene expression values were  $\log_2$  transformed. The prognostic value of the signature was evaluated only in patients who had not received adjuvant chemotherapy, if information was available. The prediction models were constructed using the signature expression values, and tested against the SPORE dataset. A supervised principal component analysis (SuperPC) (20), a widely used classification model in biomedical research, was applied for building the prediction model. The first three principle components (PCs) from genes scored  $> 0.2$  by SuperPC were submitted to the Cox regression model for overall survival time (calculated from the date of surgery until death or the last follow-up contact). The median of the estimated risk scores was used as the cut off to partition the patients into high-risk and low-risk groups. Kaplan-Meier survival curves for the high and low risk groups were compared with log-rank tests. In order to test the robustness of our signature, we firstly tested the signature by training in the 442 patient Consortium dataset and testing in the SPORE 209 mRNA dataset, then switched the datasets to train in the SPORE dataset and test in the Consortium dataset. Specificity and sensitivity of the predictive model were evaluated by a ROC curve.

**Supplementary Table S1.** Primary antibodies used for immunoblotting.

| Antibody                  | Catalogue | Manufacturer                    |
|---------------------------|-----------|---------------------------------|
| anti-p53                  | P6874     | Sigma-Aldrich                   |
| anti-K-RAS                | sc-30     | Santa Cruz Biotechnology, Inc.  |
| anti-c-MYC                | sc-40     | Santa Cruz Biotechnology, Inc.  |
| anti-E-cadherin           | 610181    | BD Bioscience                   |
| anti-N-cadherin           | 610920    | BD Bioscience                   |
| anti-vimentin             | 550513    | BD Bioscience                   |
| anti-p16 <sup>INK4A</sup> | sc-468    | Santa Cruz Biotechnology, Inc.  |
| anti-Caspase3             | 9662      | Cell Signaling Technology, Inc. |
| anti-actin                | A4700     | Sigma-Aldrich                   |
| anti-HSP90                | sc-13119  | Santa Cruz Biotechnology, Inc.  |

**Supplementary Table S2.** In vitro and in vivo characterization of soft agar clones derived from manipulated HBECs.

|                                     |         | <u>Genetic manipulation</u> |                     |       | <u>Protein expression</u> |      |       | <u>Serum dependent</u> | <u>In vitro clonogenicity (%)</u> |                       | <u>In vivo tumorigenicity</u>     |                      |                                                                                                            |
|-------------------------------------|---------|-----------------------------|---------------------|-------|---------------------------|------|-------|------------------------|-----------------------------------|-----------------------|-----------------------------------|----------------------|------------------------------------------------------------------------------------------------------------|
|                                     |         | sh-p53                      | KRAS <sup>V12</sup> | c-MYC | p53                       | KRAS | c-MYC |                        | Anchorage-dependent               | Anchorage-independent | Tumor Formation Rate <sup>b</sup> | Latency <sup>c</sup> | Histology                                                                                                  |
| <b>HBEC3<sup>p53,KRAS</sup></b>     | Clone1  | +                           | +                   | -     | -                         | ++   | -     | No                     | 41.0                              | 20.1                  | 8/8 (100%)                        | 38                   | Large cell/giant cell carcinoma (7)<br>Squamous cell carcinoma (1)                                         |
|                                     | Clone5  | +                           | +                   | -     | -                         | ++   | -     | No                     | 29.5                              | 25.3                  | 7/8 (88%)                         | 57                   | Large cell/giant cell carcinoma (5)<br>Papillary adenocarcinoma (1)<br>Poorly differentiated carcinoma (1) |
|                                     | Clone11 | +                           | +                   | -     | -                         | +    | -     | Yes                    | 39.5                              | 39.3                  | 6/8 (75%)                         | 117                  | Large cell/giant cell carcinoma (3)<br>Poorly differentiated carcinoma (2)<br>Adenocarcinoma (1)           |
|                                     | Clone6  | +                           | +                   | -     | -                         | -    | -     | Yes                    | 20.5                              | 6.0                   | 0/6 (0%)                          | -                    | N/A                                                                                                        |
|                                     | Clone7  | +                           | +                   | -     | -                         | -    | -     | No                     | 17.5                              | 7.4                   | 0/7 (0%)                          | -                    | N/A                                                                                                        |
|                                     | Clone8  | +                           | +                   | -     | -                         | +    | -     | Yes                    | 42.0                              | 5.7                   | 0/8 (0%)                          | -                    | N/A                                                                                                        |
|                                     | Clone9  | +                           | +                   | -     | -                         | +    | -     | No                     | 35.5                              | 5.0                   | 0/9 (0%)                          | -                    | N/A                                                                                                        |
| <b>HBEC3<sup>p53,KRAS,MYC</sup></b> | Clone1  | +                           | +                   | +     | -                         | +    | ++    | No                     | n.d.                              | n.d.                  | 9/9 (100%)                        | 119                  | Large cell/giant cell carcinoma (6)<br>Adenocarcinoma (2)<br>Giant cell carcinoma (1)                      |
|                                     | Clone2  | +                           | +                   | +     | -                         | +    | ++    | No                     | n.d.                              | n.d.                  | 3/8 (38%)                         | 90                   | Squamous cell carcinoma (2)<br>Large cell/giant cell carcinoma (1)                                         |
|                                     | Clone7  | +                           | +                   | +     | -                         | ++   | ++    | No                     | n.d.                              | n.d.                  | 10/10 (100%)                      | 37                   | Large cell/giant cell carcinoma (7)<br>Squamous cell carcinoma (3)                                         |
|                                     | Clone8  | +                           | +                   | +     | -                         | -    | ++    | Yes                    | n.d.                              | n.d.                  | 1/6 (17%)                         | 78                   | Large cell/giant cell carcinoma (1)                                                                        |

<sup>a</sup> As determined by ability of cells to grow in defined media (KSFM)

<sup>b</sup> Number of subcutaneous tumors/number of injections (percentage)

<sup>c</sup> Median time (days) for s.c. xenografts to reach 250mm<sup>3</sup>

n.d., not determined

**Supplementary Table S3:** Drug response phenotypes of isogenic clones of oncogenically manipulated HBECs.

| Cell line                  |          | In vivo<br>tumorigenicity | ED <sub>50</sub>      |                      |                      |
|----------------------------|----------|---------------------------|-----------------------|----------------------|----------------------|
|                            |          |                           | Pac +<br>Carb<br>(nM) | Gem +<br>Cis<br>(nM) | Pem +<br>Cis<br>(μM) |
| HBEC3                      |          | No                        | 2 ± 0.1               | 28 ± 8.2             | 13 ± 1.0             |
| HBEC3 <sup>p53, KRAS</sup> |          | Yes                       | 2 ± 0.6               | 5 ± 0.4              | 1 ± 0.7              |
| HBEC3 <sup>p53, KRAS</sup> | Clone 1  | Yes                       | 3 ± 0.4               | 4 ± 0.4              | 0.6 ± 0.3            |
| HBEC3 <sup>p53, KRAS</sup> | Clone 5  | Yes                       | 4 ± 0.3               | 9 ± 4.0              | 4 ± 3.2              |
| HBEC3 <sup>p53, KRAS</sup> | Clone 6  | No                        | 2 ± 0.5               | 4 ± 0.4              | 1 ± 0.2              |
| HBEC3 <sup>p53, KRAS</sup> | Clone 7  | No                        | 3 ± 0.3               | 10 ± 7.9             | 4 ± 1.3              |
| HBEC3 <sup>p53, KRAS</sup> | Clone 8  | No                        | 3 ± 0.3               | 4 ± 1.1              | 2 ± 2.1              |
| HBEC3 <sup>p53, KRAS</sup> | Clone 9  | No                        | 2 ± 0.3               | 4 ± 0.4              | 3 ± 1.0              |
| HBEC3 <sup>p53, KRAS</sup> | Clone 11 | Yes                       | 3 ± 1.2               | 5 ± 3.0              | 3 ± 2.6              |

Gem, gemcitabine; Cis, cisplatin; Pac, paclitaxel; Carb, carboplatin; Pem, pemetrexed.

**Supplementary Table S4:** Significantly differentially expressed genes between tumorigenic (Clones 1, 5 and 11) and non-tumorigenic (Clones 6, 7, 8 and 9) soft agar clones of HBEC3<sup>p53,KRAS</sup>.

| Symbol    | Illumina Probe | Accession    | Tumori-<br>genic<br>clones <sup>a,b</sup> | Non-<br>Tumorigenic<br>clones <sup>a,b</sup> | Tumor-<br>igenic/Non-<br>Tumorigenic <sup>b</sup> | SAM P<br>value<br>(FDR<br>=5%) |
|-----------|----------------|--------------|-------------------------------------------|----------------------------------------------|---------------------------------------------------|--------------------------------|
| HLA-DRB1  | ILMN_1697499   | NM_002125    | 9.45                                      | 4.01                                         | 5.44                                              | 0.000                          |
| TNFRSF11B | ILMN_1676663   | NM_002546    | 9.14                                      | 3.93                                         | 5.21                                              | 0.000                          |
| VIPR1     | ILMN_2199389   | NM_004624    | 10.93                                     | 5.80                                         | 5.13                                              | 0.000                          |
| COLEC12   | ILMN_1689088   | NM_130386    | 9.37                                      | 4.87                                         | 4.50                                              | 0.000                          |
| RTN1      | ILMN_1756928   | NM_021136    | 8.10                                      | 3.77                                         | 4.33                                              | 0.000                          |
| HLA-DRB1  | ILMN_1715169   | NM_002124    | 9.44                                      | 5.17                                         | 4.27                                              | 0.000                          |
| CD74      | ILMN_2379644   | NM_004355    | 7.58                                      | 3.41                                         | 4.17                                              | 0.000                          |
| KIAA1199  | ILMN_1813704   | NM_018689    | 11.51                                     | 7.35                                         | 4.16                                              | 0.000                          |
| RFX8      | ILMN_1783840   | NM_001145664 | 7.34                                      | 3.18                                         | 4.16                                              | 0.000                          |
| HLA-DRA   | ILMN_2157441   | NM_019111    | 9.11                                      | 5.03                                         | 4.08                                              | 0.000                          |
| HLA-DPA1  | ILMN_1772218   | NM_033554    | 8.30                                      | 4.25                                         | 4.05                                              | 0.000                          |
| TNFRSF1B  | ILMN_1764788   | NM_001066    | 7.86                                      | 3.92                                         | 3.93                                              | 0.000                          |
| SCG2      | ILMN_1703178   | NM_003469    | 11.29                                     | 7.38                                         | 3.92                                              | 0.000                          |
| CD74      | ILMN_1736567   | NM_001025159 | 9.15                                      | 5.30                                         | 3.85                                              | 0.000                          |
| NR4A2     | ILMN_2339955   | NM_006186    | 8.45                                      | 4.72                                         | 3.74                                              | 0.000                          |
| HOXB6     | ILMN_1768101   | NM_018952    | 7.77                                      | 4.07                                         | 3.70                                              | 0.000                          |
| UCHL1     | ILMN_1757387   | NM_004181    | 10.73                                     | 7.06                                         | 3.67                                              | 0.001                          |
| HLA-DRB6  | ILMN_2066066   | L76565       | 8.39                                      | 4.73                                         | 3.66                                              | 0.000                          |
| HLA-DRB1  | ILMN_1752592   | NM_021983    | 9.49                                      | 5.94                                         | 3.54                                              | 0.000                          |
| IFITM1    | ILMN_1801246   | NM_003641    | 10.03                                     | 6.50                                         | 3.53                                              | 0.000                          |
| HOXB5     | ILMN_1674908   | NM_002147    | 8.85                                      | 5.38                                         | 3.47                                              | 0.000                          |
| SLC7A14   | ILMN_1676602   | NM_020949    | 8.52                                      | 5.16                                         | 3.36                                              | 0.001                          |
|           | ILMN_2066060   | NR_001298    | 7.28                                      | 4.01                                         | 3.27                                              | 0.000                          |
| PARM1     | ILMN_1656560   | NM_015393    | 7.05                                      | 3.78                                         | 3.27                                              | 0.000                          |
| SLC14A1   | ILMN_1805561   | NM_015865    | 7.83                                      | 4.57                                         | 3.26                                              | 0.000                          |
| ARMCX2    | ILMN_1785170   | NM_177949    | 8.04                                      | 4.89                                         | 3.15                                              | 0.001                          |
| COL22A1   | ILMN_1784532   | NM_152888    | 8.39                                      | 5.26                                         | 3.13                                              | 0.000                          |
| SLC22A18  | ILMN_2382505   | NM_002555    | 8.10                                      | 5.00                                         | 3.10                                              | 0.000                          |
| CCL20     | ILMN_1657234   | NM_004591    | 11.27                                     | 8.21                                         | 3.06                                              | 0.000                          |
| PRRX1     | ILMN_1739496   | NM_006902    | 10.29                                     | 7.25                                         | 3.04                                              | 0.000                          |
| C11orf96  | ILMN_1677402   | NM_001145033 | 9.23                                      | 6.21                                         | 3.02                                              | 0.000                          |
| PDE4B     | ILMN_2340259   | NM_002600    | 6.91                                      | 3.90                                         | 3.01                                              | 0.000                          |
| CFB       | ILMN_1774287   | NM_001710    | 11.59                                     | 8.59                                         | 3.00                                              | 0.000                          |
| PLA2G7    | ILMN_1701195   | NM_005084    | 7.89                                      | 4.90                                         | 2.99                                              | 0.000                          |
| NR4A2     | ILMN_1782305   | NM_006186    | 10.02                                     | 7.05                                         | 2.97                                              | 0.000                          |
| COL6A2    | ILMN_1809928   | NM_001849    | 6.85                                      | 3.90                                         | 2.95                                              | 0.000                          |
| TOX2      | ILMN_2082209   | NM_032883    | 12.20                                     | 9.25                                         | 2.95                                              | 0.001                          |
| OSCAR     | ILMN_2367418   | NM_133169    | 6.40                                      | 3.51                                         | 2.89                                              | 0.000                          |
| IZUMO4    | ILMN_1734346   | NM_001039846 | 7.75                                      | 4.89                                         | 2.86                                              | 0.000                          |

|          |              |              |       |      |      |       |
|----------|--------------|--------------|-------|------|------|-------|
| MDK      | ILMN_2261876 | NM_001012334 | 6.60  | 3.78 | 2.82 | 0.000 |
| COL6A2   | ILMN_1783909 | NM_001849    | 7.60  | 4.78 | 2.82 | 0.001 |
| AFF3     | ILMN_1775235 | NM_001025108 | 6.71  | 3.93 | 2.78 | 0.000 |
| SNTB1    | ILMN_1793410 | NM_021021    | 7.35  | 4.62 | 2.73 | 0.001 |
| GFPT2    | ILMN_1709674 | NM_005110    | 11.49 | 8.79 | 2.70 | 0.000 |
| C4orf31  | ILMN_1689176 | NM_024574    | 6.27  | 3.83 | 2.44 | 0.000 |
| PDLIM3   | ILMN_2230025 | NM_014476    | 7.37  | 5.01 | 2.36 | 0.000 |
| TNFSF15  | ILMN_1759501 | NM_005118    | 6.17  | 3.81 | 2.36 | 0.000 |
| METRNL   | ILMN_2342066 | NM_001004431 | 7.17  | 4.81 | 2.35 | 0.000 |
| C1R      | ILMN_1764109 | NM_001733    | 9.48  | 7.14 | 2.34 | 0.000 |
| MICA     | ILMN_1803945 | NM_006674    | 9.71  | 7.38 | 2.33 | 0.000 |
| MRPS6    | ILMN_1787813 | NM_006933    | 8.24  | 5.94 | 2.30 | 0.000 |
| HSD17B14 | ILMN_1809483 | NM_016246    | 5.70  | 3.41 | 2.29 | 0.000 |
| PKIB     | ILMN_2337263 | NM_032471    | 7.25  | 4.97 | 2.28 | 0.000 |
| FRMD4A   | ILMN_1678961 | NM_018027    | 9.18  | 6.92 | 2.26 | 0.000 |
| IL1RAPL1 | ILMN_2160428 | AJ243874     | 7.80  | 5.54 | 2.25 | 0.000 |
| BCAT1    | ILMN_1766169 | NM_005504    | 8.88  | 6.64 | 2.24 | 0.001 |
| SLC22A18 | ILMN_1724902 | NM_183233    | 5.78  | 3.54 | 2.24 | 0.000 |
| SOD2     | ILMN_1792922 | NM_000636    | 5.99  | 3.77 | 2.22 | 0.000 |
| MDK      | ILMN_2349393 | NM_001012334 | 10.73 | 8.52 | 2.21 | 0.000 |
| DDIT4L   | ILMN_1696537 | NM_145244    | 7.95  | 5.74 | 2.21 | 0.000 |
| HLA-DRB1 | ILMN_1815895 | HM067851     | 6.61  | 4.40 | 2.21 | 0.000 |
| PDLIM3   | ILMN_1695299 | NM_014476    | 6.50  | 4.30 | 2.20 | 0.000 |
| DDR2     | ILMN_2410523 | NM_006182    | 5.99  | 3.80 | 2.19 | 0.000 |
| KCNG1    | ILMN_1673769 | NM_002237    | 9.62  | 7.43 | 2.19 | 0.000 |
| ST8SIA1  | ILMN_1664859 | NM_003034    | 5.97  | 3.78 | 2.18 | 0.000 |
|          | ILMN_1862684 | 0            | 6.51  | 4.35 | 2.16 | 0.000 |
| JAM2     | ILMN_1672350 | NM_021219    | 6.75  | 4.61 | 2.14 | 0.000 |
| NAMPT    | ILMN_1653871 | NM_005746    | 10.78 | 8.67 | 2.11 | 0.000 |
| C13orf15 | ILMN_1658494 | NM_014059    | 9.97  | 7.92 | 2.05 | 0.001 |
| VWA5A    | ILMN_1764769 | NM_014622    | 7.68  | 5.63 | 2.05 | 0.001 |
| FLJ42351 | ILMN_1885771 | AK124342     | 6.32  | 4.30 | 2.02 | 0.000 |
| KCNAB1   | ILMN_1744968 | NM_003471    | 6.42  | 4.40 | 2.02 | 0.000 |
| CD302    | ILMN_1716797 | NM_014880    | 5.91  | 3.90 | 2.01 | 0.001 |
| SIRT4    | ILMN_1657868 | NM_012240    | 6.14  | 4.13 | 2.01 | 0.000 |
| HLA-B    | ILMN_1778401 | NM_005514    | 11.85 | 9.84 | 2.01 | 0.000 |
| APCDD1L  | ILMN_1689431 | NM_153360    | 11.09 | 9.11 | 1.98 | 0.000 |
| ARRDC3   | ILMN_2198516 | NM_020801    | 6.63  | 4.65 | 1.98 | 0.001 |
| TRIB2    | ILMN_1714700 | NM_021643    | 8.51  | 6.64 | 1.88 | 0.000 |
| SIRPG    | ILMN_1771801 | NM_001039508 | 5.54  | 3.66 | 1.88 | 0.000 |
| PYROXD2  | ILMN_1684497 | NM_032709    | 7.90  | 6.03 | 1.87 | 0.000 |
| RPS6KA2  | ILMN_1702501 | NM_001006932 | 9.50  | 7.63 | 1.87 | 0.000 |
| CA11     | ILMN_1743219 | NM_001217    | 6.60  | 4.76 | 1.84 | 0.000 |
| MAFB     | ILMN_1764709 | NM_005461    | 9.05  | 7.25 | 1.80 | 0.001 |
| TTLL3    | ILMN_1682818 | NM_001025930 | 6.74  | 4.94 | 1.80 | 0.001 |
| SLC2A3   | ILMN_1775708 | M20681       | 10.89 | 9.11 | 1.78 | 0.000 |
| THBS4    | ILMN_1736078 | NM_003248    | 5.41  | 3.68 | 1.74 | 0.000 |
|          | ILMN_1773819 | NG_021318    | 6.35  | 4.64 | 1.71 | 0.000 |
| EGR2     | ILMN_1743199 | J04076       | 7.16  | 5.45 | 1.71 | 0.001 |
| STEAP2   | ILMN_2344298 | NM_152999    | 7.36  | 5.66 | 1.70 | 0.001 |



|          |              |              |       |       |       |       |
|----------|--------------|--------------|-------|-------|-------|-------|
| H6PD     | ILMN_1721136 | NM_004285    | 6.94  | 5.28  | 1.66  | 0.000 |
|          | ILMN_2186806 | 0            | 10.93 | 9.28  | 1.65  | 0.001 |
| MAN1A1   | ILMN_1742187 | NM_005907    | 5.80  | 4.17  | 1.63  | 0.000 |
| CHGB     | ILMN_1765966 | NM_001819    | 5.33  | 3.70  | 1.63  | 0.000 |
| KCNMB4   | ILMN_1727466 | NM_014505    | 7.46  | 5.84  | 1.62  | 0.000 |
| PRRX1    | ILMN_1811851 | NM_006902    | 5.68  | 4.09  | 1.59  | 0.000 |
| REPS2    | ILMN_1656934 | NM_004726    | 7.97  | 6.38  | 1.59  | 0.000 |
| ATHL1    | ILMN_1794707 | NM_025092    | 6.43  | 4.85  | 1.58  | 0.000 |
| ISG20    | ILMN_1659913 | NM_002201    | 10.51 | 8.95  | 1.56  | 0.000 |
| DBP      | ILMN_1715555 | NM_001352    | 7.42  | 5.86  | 1.56  | 0.000 |
| C3orf17  | ILMN_2331658 | NM_015412    | 6.43  | 4.89  | 1.54  | 0.001 |
| VEGFA    | ILMN_1803882 | NM_001025367 | 8.95  | 7.41  | 1.54  | 0.001 |
| ZFP36    | ILMN_1720829 | NM_003407    | 11.00 | 9.47  | 1.53  | 0.001 |
|          | ILMN_2130441 | M32106       | 12.35 | 10.82 | 1.53  | 0.000 |
| TMTC1    | ILMN_1811426 | NM_175861    | 6.17  | 4.69  | 1.48  | 0.001 |
| ABCC3    | ILMN_1677814 | AF085692     | 8.81  | 7.34  | 1.47  | 0.000 |
| WIPI1    | ILMN_1781386 | NM_017983    | 9.48  | 8.01  | 1.47  | 0.000 |
| SERPINE2 | ILMN_1655595 | NM_006216    | 14.63 | 13.16 | 1.47  | 0.000 |
| CRAT     | ILMN_1737992 | NM_000755    | 6.64  | 5.17  | 1.47  | 0.001 |
| MIER2    | ILMN_1694878 | AB033019     | 7.33  | 5.88  | 1.45  | 0.001 |
|          | ILMN_1699058 | 0            | 7.67  | 6.22  | 1.45  | 0.000 |
| FAM196A  | ILMN_2071682 | NM_001039762 | 5.04  | 3.63  | 1.41  | 0.000 |
| TMEM159  | ILMN_1655876 | NM_020422    | 8.50  | 7.14  | 1.36  | 0.001 |
| OSBPL5   | ILMN_1802151 | NM_020896    | 7.75  | 6.39  | 1.36  | 0.001 |
| TPP1     | ILMN_1729234 | NM_000391    | 11.00 | 9.67  | 1.33  | 0.001 |
| CEBPD    | ILMN_1782050 | NM_005195    | 11.64 | 10.32 | 1.32  | 0.001 |
| TEF      | ILMN_1706511 | NM_003216    | 6.07  | 4.76  | 1.31  | 0.001 |
| IZUMO4   | ILMN_2400546 | NM_001039846 | 4.90  | 3.59  | 1.31  | 0.000 |
|          | ILMN_1670410 | NR_028326    | 5.99  | 4.69  | 1.30  | 0.000 |
| RGS17    | ILMN_1725485 | NM_012419    | 9.05  | 7.77  | 1.28  | 0.001 |
| LETMD1   | ILMN_2264681 | NM_015416    | 8.34  | 7.06  | 1.28  | 0.000 |
| FOXO4    | ILMN_1712095 | NM_005938    | 8.51  | 7.28  | 1.23  | 0.001 |
| MTHFR    | ILMN_1734830 | NM_005957    | 5.79  | 4.58  | 1.21  | 0.001 |
| SPRY2    | ILMN_2089329 | NM_005842    | 10.87 | 9.66  | 1.21  | 0.000 |
| TRIB1    | ILMN_1803811 | NM_025195    | 10.71 | 9.54  | 1.17  | 0.000 |
| FAM108C1 | ILMN_1788416 | NM_021214    | 10.94 | 9.77  | 1.17  | 0.001 |
| PTPRA    | ILMN_1695461 | NM_080840    | 5.52  | 4.36  | 1.16  | 0.001 |
| TSC22D1  | ILMN_1692177 | NM_006022    | 12.02 | 10.89 | 1.13  | 0.000 |
| DMRTB1   | ILMN_1754187 | NM_033067    | 4.40  | 3.30  | 1.10  | 0.001 |
| HLA-A    | ILMN_1671054 | NM_002116    | 11.54 | 10.44 | 1.10  | 0.001 |
| SLC27A1  | ILMN_1787718 | NM_198580    | 8.21  | 7.12  | 1.09  | 0.001 |
| KLF9     | ILMN_1778523 | NM_001206    | 10.70 | 9.61  | 1.09  | 0.001 |
|          | ILMN_1761478 | AK130343     | 4.31  | 3.22  | 1.09  | 0.000 |
| FMNL2    | ILMN_1730491 | NM_052905    | 8.21  | 7.13  | 1.08  | 0.001 |
| BCL6     | ILMN_1737314 | NM_001706    | 10.36 | 9.28  | 1.08  | 0.000 |
| AMY2A    | ILMN_1801303 | NM_000699    | 4.87  | 3.83  | 1.04  | 0.000 |
| TRAF5    | ILMN_1740493 | NM_004619    | 5.14  | 4.11  | 1.03  | 0.001 |
| GALNT10  | ILMN_1662556 | NM_198321    | 5.23  | 6.25  | -1.02 | 0.000 |
| CHTF18   | ILMN_1756705 | NM_022092    | 5.97  | 7.00  | -1.02 | 0.001 |
| MT1A     | ILMN_1691156 | NM_005946    | 13.56 | 14.61 | -1.05 | 0.000 |

|           |              |              |       |       |       |       |
|-----------|--------------|--------------|-------|-------|-------|-------|
| DEM1      | ILMN_1783996 | NM_022774    | 6.16  | 7.23  | -1.07 | 0.000 |
|           | ILMN_1761281 | 0            | 11.04 | 12.18 | -1.14 | 0.000 |
| LAMC2     | ILMN_1653824 | NM_005562    | 10.33 | 11.51 | -1.18 | 0.000 |
| NHLRC3    | ILMN_1698365 | NM_001012754 | 3.93  | 5.12  | -1.19 | 0.001 |
| CDC45     | ILMN_1670238 | NM_003504    | 9.37  | 10.60 | -1.23 | 0.000 |
| ZBTB8A    | ILMN_2264205 | NM_001040441 | 4.46  | 5.69  | -1.23 | 0.000 |
| MOSPD1    | ILMN_1727798 | NM_019556    | 4.56  | 5.81  | -1.25 | 0.000 |
| FGF5      | ILMN_2399100 | NM_033143    | 4.44  | 5.72  | -1.28 | 0.000 |
| TMEM27    | ILMN_1772894 | NM_020665    | 4.50  | 5.78  | -1.28 | 0.000 |
| BLCAP     | ILMN_1675612 | NM_006698    | 9.36  | 10.68 | -1.32 | 0.000 |
| HMMR      | ILMN_1781942 | NM_012485    | 9.55  | 10.89 | -1.33 | 0.000 |
| LAMC2     | ILMN_1706519 | NM_018891    | 6.76  | 8.10  | -1.34 | 0.000 |
| GCLM      | ILMN_2225974 | NM_002061    | 5.81  | 7.15  | -1.34 | 0.001 |
| BUB3      | ILMN_2386100 | NM_001007793 | 8.62  | 9.96  | -1.34 | 0.000 |
| DOCK5     | ILMN_1752455 | NM_024940    | 6.43  | 7.78  | -1.35 | 0.000 |
| BLM       | ILMN_1709484 | NM_000057    | 4.95  | 6.31  | -1.36 | 0.001 |
| DTL       | ILMN_1779711 | NM_016448    | 6.20  | 7.55  | -1.36 | 0.000 |
| BIRC5     | ILMN_1803124 | NM_001012271 | 5.72  | 7.10  | -1.39 | 0.000 |
| FAM41C    | ILMN_1728059 | BC047940     | 7.45  | 8.85  | -1.40 | 0.000 |
| HMMR      | ILMN_2409220 | NM_012484    | 8.79  | 10.19 | -1.40 | 0.000 |
| DNAJC19   | ILMN_1742109 | NM_145261    | 5.22  | 6.64  | -1.42 | 0.000 |
| ARHGAP11A | ILMN_1744830 | NM_014783    | 4.01  | 5.47  | -1.45 | 0.000 |
| DST       | ILMN_1675992 | NM_001723    | 5.33  | 6.84  | -1.51 | 0.000 |
| NUP62CL   | ILMN_1756550 | NM_017681    | 5.37  | 6.88  | -1.51 | 0.000 |
| CENPM     | ILMN_2368721 | NM_001002876 | 6.67  | 8.22  | -1.55 | 0.001 |
| EDEM2     | ILMN_1662640 | BC133653     | 8.38  | 9.94  | -1.57 | 0.000 |
| MT1IP     | ILMN_2136089 | AF348997     | 9.52  | 11.13 | -1.61 | 0.000 |
| SLC29A1   | ILMN_1723971 | NM_001078174 | 6.24  | 7.93  | -1.69 | 0.000 |
| FEZ1      | ILMN_1794106 | NM_022549    | 6.82  | 8.53  | -1.71 | 0.000 |
| P2RY2     | ILMN_2372915 | NM_002564    | 5.57  | 7.30  | -1.73 | 0.000 |
| MT1G      | ILMN_1715401 | NM_005950    | 7.88  | 9.63  | -1.75 | 0.000 |
| SERPINB7  | ILMN_2395139 | NM_003784    | 7.41  | 9.21  | -1.80 | 0.000 |
| SERPINB7  | ILMN_1767685 | NM_003784    | 8.59  | 10.41 | -1.82 | 0.000 |
| MCM10     | ILMN_2413899 | NM_018518    | 4.61  | 6.44  | -1.83 | 0.000 |
| FAIM      | ILMN_2351548 | NM_001033032 | 3.55  | 5.40  | -1.85 | 0.001 |
| KRT7      | ILMN_2163723 | NM_005556    | 10.66 | 12.54 | -1.88 | 0.000 |
| MT1E      | ILMN_2173611 | NM_175617    | 11.31 | 13.20 | -1.89 | 0.000 |
| TCF7      | ILMN_2367141 | NM_201632    | 4.33  | 6.30  | -1.97 | 0.000 |
| FERMT1    | ILMN_1696585 | NM_017671    | 6.99  | 9.07  | -2.08 | 0.000 |
| CLN6      | ILMN_1776267 | NM_017882    | 3.63  | 5.75  | -2.12 | 0.000 |
| SLC29A3   | ILMN_1717326 | AY358686     | 3.85  | 6.02  | -2.17 | 0.000 |
| TTLL11    | ILMN_1784356 | NM_001139442 | 5.40  | 7.57  | -2.17 | 0.000 |
| NXN       | ILMN_1791226 | NM_022463    | 7.92  | 10.14 | -2.22 | 0.000 |
| CADM1     | ILMN_1680132 | NM_014333    | 5.85  | 8.18  | -2.33 | 0.000 |
| DSC3      | ILMN_1765363 | NM_024423    | 6.20  | 8.60  | -2.40 | 0.000 |
| CDH3      | ILMN_1704294 | NM_001793    | 6.61  | 9.02  | -2.41 | 0.000 |
| LOC730755 | ILMN_1660067 | NM_001165252 | 5.61  | 8.04  | -2.43 | 0.000 |
| SERPINB5  | ILMN_1793888 | U04313       | 8.92  | 11.41 | -2.49 | 0.000 |
| JAG2      | ILMN_1764729 | NM_002226    | 6.10  | 8.81  | -2.71 | 0.000 |
| GJB3      | ILMN_2334531 | NM_001005752 | 3.21  | 6.00  | -2.79 | 0.000 |

|           |              |              |      |       |       |       |
|-----------|--------------|--------------|------|-------|-------|-------|
| JAG2      | ILMN_2399523 | NM_145159    | 4.47 | 7.27  | -2.80 | 0.000 |
| ANXA8L1   | ILMN_1799098 | NM_001098845 | 7.68 | 10.54 | -2.86 | 0.000 |
| PLXNA2    | ILMN_1844408 | NM_025179    | 4.90 | 7.79  | -2.89 | 0.000 |
| ANXA8L2   | ILMN_1778087 | BC008813     | 8.78 | 11.67 | -2.89 | 0.000 |
| SCARA3    | ILMN_1723358 | NM_016240    | 5.03 | 7.96  | -2.93 | 0.000 |
| S100A2    | ILMN_1725852 | NM_005978    | 8.43 | 11.42 | -2.99 | 0.000 |
| ANXA8     | ILMN_2095610 | NM_001040084 | 6.95 | 10.12 | -3.17 | 0.000 |
| TP63      | ILMN_2138801 | NM_003722    | 5.82 | 9.06  | -3.24 | 0.000 |
| ANXA8L2   | ILMN_2186983 | NM_001630    | 7.13 | 10.40 | -3.27 | 0.000 |
| RNASE7    | ILMN_1712849 | AY170392     | 3.65 | 6.98  | -3.33 | 0.000 |
| KBTBD11   | ILMN_1784630 | NM_014867    | 3.25 | 6.65  | -3.40 | 0.001 |
| KRT81     | ILMN_1801442 | NM_002281    | 4.13 | 7.63  | -3.50 | 0.000 |
| LOC728449 | ILMN_1661628 | XM_001128973 | 5.67 | 9.36  | -3.69 | 0.000 |
| ZBED2     | ILMN_1651365 | NM_024508    | 4.07 | 8.21  | -4.14 | 0.000 |

<sup>a</sup>Mean expression across tumorigenic (Clones 1, 5, and 11) and non-tumorigenic (Clones 6, 7, 8, and 9) soft agar clones

<sup>b</sup>Log<sub>2</sub> transformed

**Supplementary Figure S1:** **A)** Anchorage-dependent colony formation assays comparing tumorigenic clones (Clone1, Clone5, and Clone11) and non-tumorigenic clones (Clone6, Clone7, Clone8 and Clone9). **B)** Phase contrast photomicrographs of HBEC3 infected with LacZ control vector (*left*), high level KRAS<sup>V12</sup> (*middle*) lentivirus, or moderate level KRAS<sup>V12</sup> (*right*) retrovirus showing high level KRAS<sup>V12</sup>-induced morphologic changes: enlarged, flattened cells with multiple vacuoles, suggestive of senescence (arrows) (20X magnification). **C)** Senescence-associated  $\beta$ -galactosidase (SA- $\beta$ -gal) staining of confluent cultures for HBEC3 with wildtype p53 (*left*) or p53 knockdown (*right*) infected with high level KRAS<sup>V12</sup> lentivirus showing the flattened, vacuole-rich cells are positive for SA- $\beta$ -gal staining (arrows) (10X magnification). **D-E)** Anchorage-dependent colony formation assay to compare acute KRAS<sup>V12</sup>-induced toxicity in HBEC3 (**D**) and HBEC4 (**E**) with wildtype p53 or p53 knockdown. **F)** Anchorage-dependent colony formation assay to compare acute KRAS<sup>C12</sup>- and KRAS<sup>D12</sup>-induced toxicity in HBEC3 with wildtype p53 or p53 knockdown. **G)** Phase contrast images of HBEC3 taken two weeks after transduction with either pLenti6-KRAS<sup>WT</sup>, -KRAS<sup>C12</sup>, or -KRAS<sup>D12</sup> lentivirus and blasticidin selection. **H)** Cell cycle analysis of HBEC3 with wildtype p53 or p53 knockdown harvested three days after infection with either KRAS<sup>V12</sup> or LacZ lentivirus.

**Supplementary Figure S2:** **A)** Representative adenocarcinoma histology from formalin-fixed paraffin-embedded sections of subcutaneous xenografts of oncogenically manipulated HBECs at lower (*upper panel*) and higher (*lower panel*) magnification stained with adenocarcinoma (Napsin A and cytokeratin 7 (CK7)) and squamous cell (CK5) markers. **B)** Transformation of HBEC17 with sh-p53, KRAS<sup>V12</sup>, and c-MYC as measured by anchorage-independent growth in soft agar. \*\*P < 0.01 (*t*-test).

**Supplementary Figure S3:** **A)** Cell proliferation assay of HBEC3 and HBEC3<sup>p53,KRAS</sup> in KSFM (with EGF/BPE) or RPMI1640 with or without FBS. **B)** qRT-PCR analysis of differentiation and CSC markers in HBEC3, HBEC3<sup>p53,KRAS</sup> and HBEC3<sup>p53,KRAS,MYC</sup>. **C)** qRT-PCR analysis of differentiation and CSC markers in HBEC3, HBEC3<sup>p53,KRAS</sup> and HBEC3<sup>p53,KRAS,MYC</sup> following growth in KSFM or KSFM+5%FBS for 96 hr. **D)** Phase contrast images of HBEC3, HBEC3<sup>p53,KRAS</sup> and HBEC3<sup>p53,KRAS,MYC</sup> following growth in KSFM or KSFM+5%FBS for 96 hr. **E)** TUNEL staining of subcutaneous tumor xenografts derived from HBEC3<sup>p53,KRAS</sup> and HBEC3<sup>p53,KRAS,MYC</sup> showing the presence of nicks in the DNA identified by terminal deoxynucleotidyl transferase (TdT) labeled with FITC. Nuclei stained with DAPI. GCC, giant cell carcinoma; LCC, large cell carcinoma; SCC, squamous cell carcinoma; AC, adenocarcinoma; P diff, poorly differentiated; M-W diff, moderate to well differentiated.

**Supplementary Figure S4:** **A)** Southern blotting for parental population and clones of HBEC3<sup>p53,KRAS</sup> and HBEC3<sup>p53,KRAS,MYC</sup> derived from very large soft agar colonies. DNA was probed with a biotin-labeled probe amplified from the *blasticidin* mammalian resistance gene present in the pLenti-KRAS<sup>V12</sup> vector. Parental, uncloned population grown in R10; MM, Molecular Marker; Clone5\*, cell line re-established from a tumor produced by Clone 5. **B)** Anchorage-independent growth of isogenic derivatives of HBEC3 in soft agar assays in KSFM with and without 20% FBS.

**Supplementary Figure S5: Representative dose-response curves of HBEC3 and HBEC3<sup>p53,KRAS</sup> treated with standard lung cancer chemotherapy doublets.**



**Supplementary Figure S6: Cell cycle analysis of soft agar clones of HBEC3<sup>p53, KRAS</sup>.** Cell cycle analysis comparing tumorigenic clones (Clone1, Clone5, and Clone11) and non-tumorigenic clones (Clone6, Clone7, Clone8 and Clone9).

**Supplementary Figure S7: Microarray analysis of 203-probe mRNA gene signature differentially expressed between tumorigenic and non-tumorigenic soft agar clones of HBE3<sup>p53, KRAS</sup> against clinical variables. A-B)** Kaplan-Meier log-rank analysis of relapse-free (RF) survival in lung cancer patients predicted to have good or poor outcome using the 203 probe signature identified in the supervised analysis. A supervised principal component analysis was used to train the model in one dataset (SPORE) and test in a second dataset (Consortium) (A) then the datasets were reversed to test for model robustness (B).

**Supplementary Figure S8: Full, uncut blots of immunoblots presented in main article.**

Supplementary Figure S1

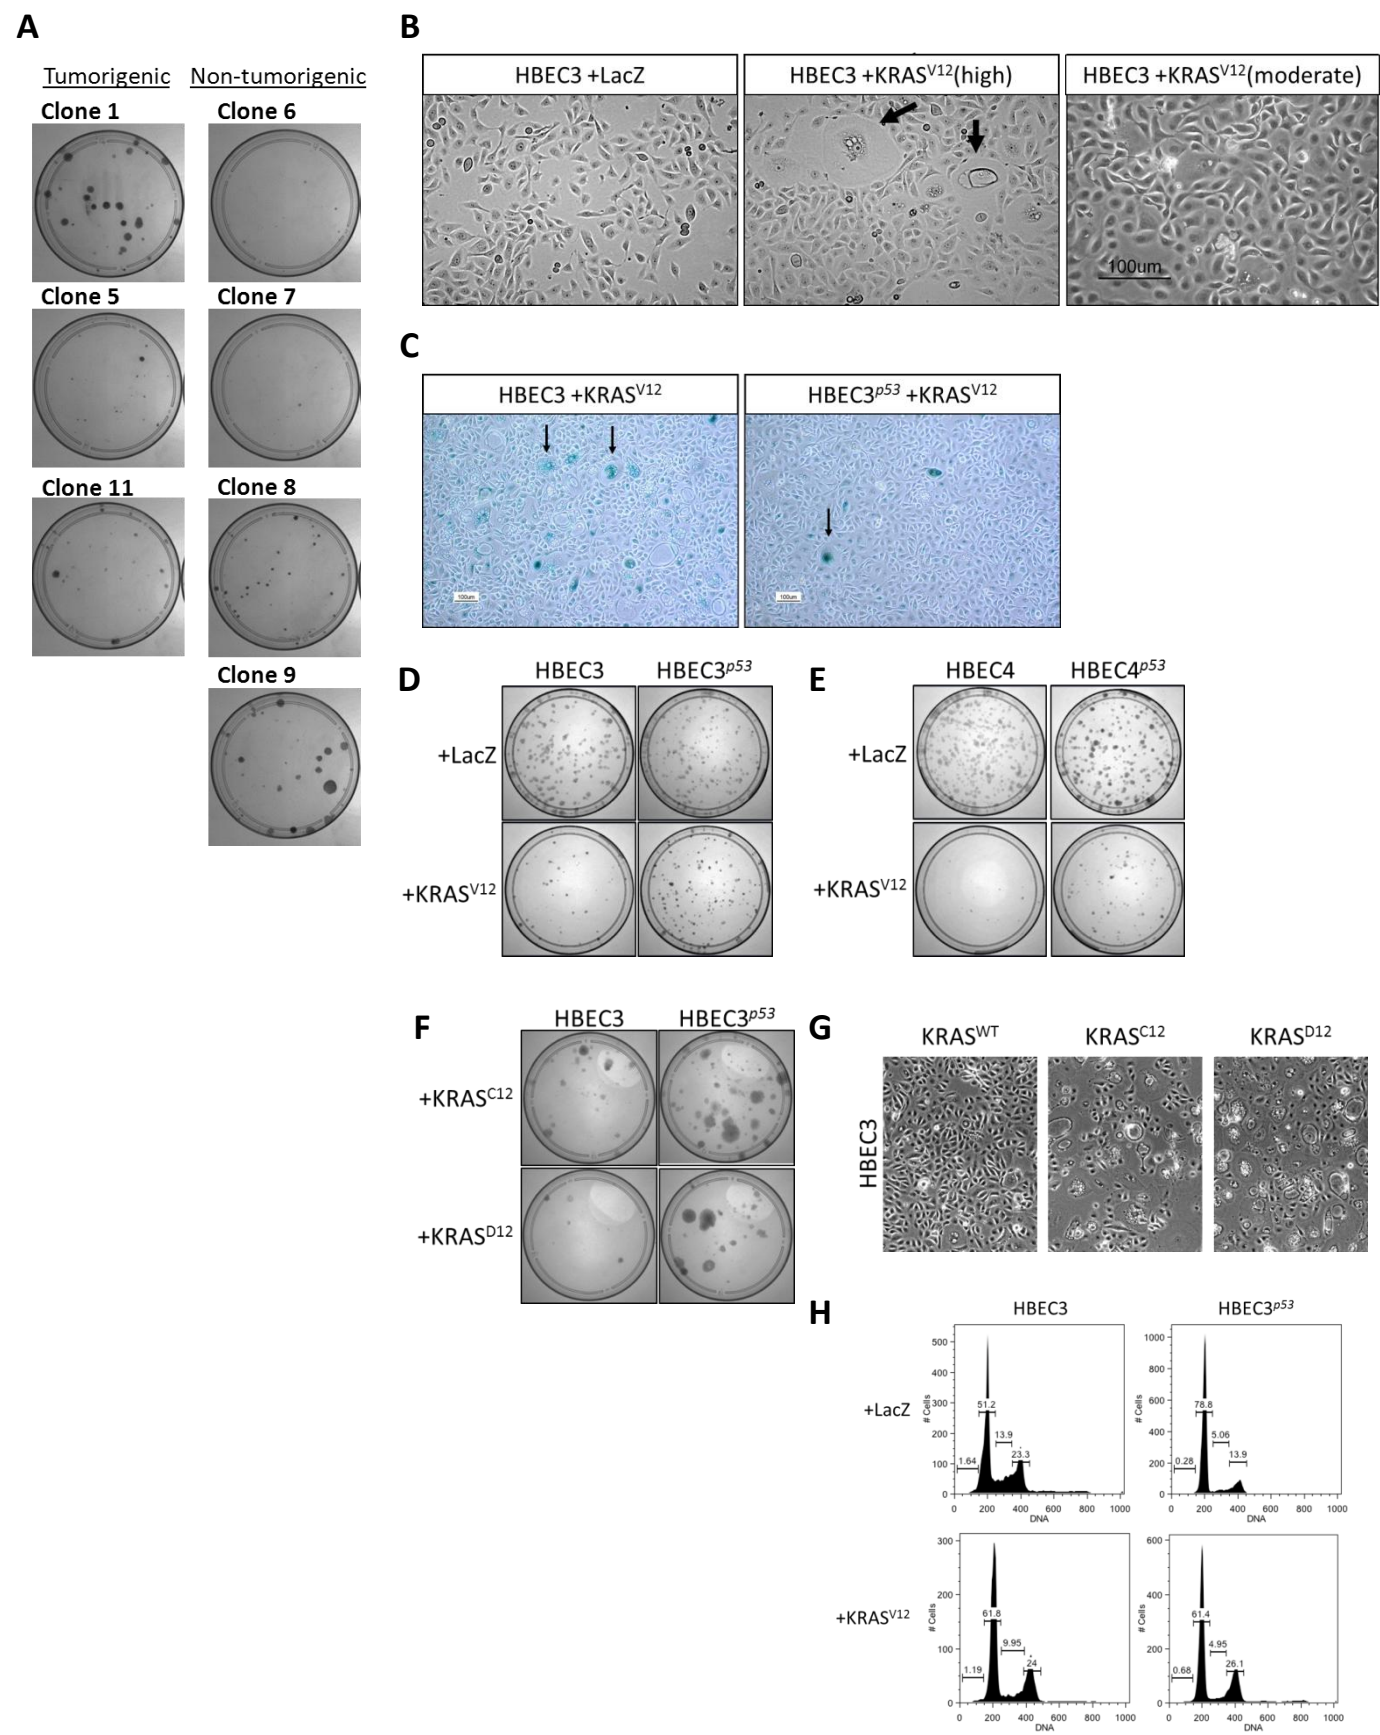

Supplementary Figure S2

A

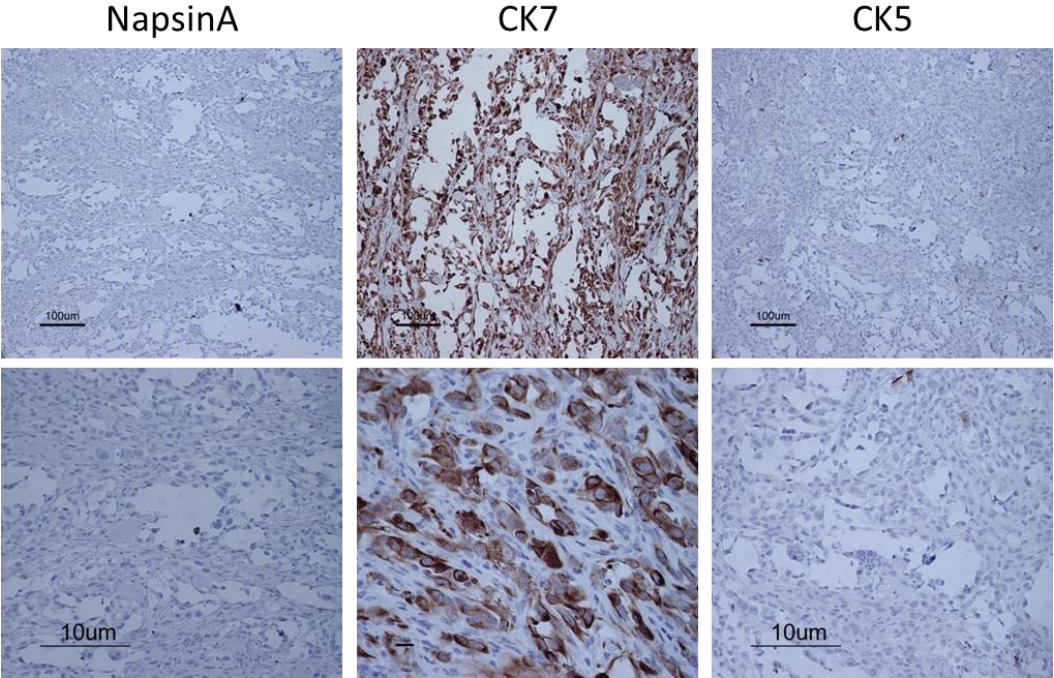

B

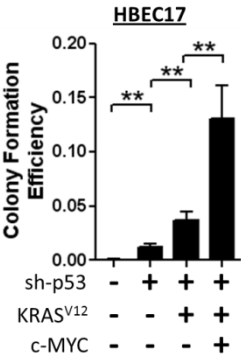

Supplementary Figure S3

A

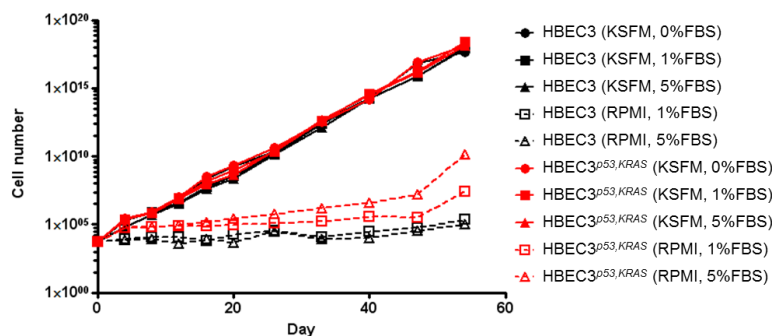

B

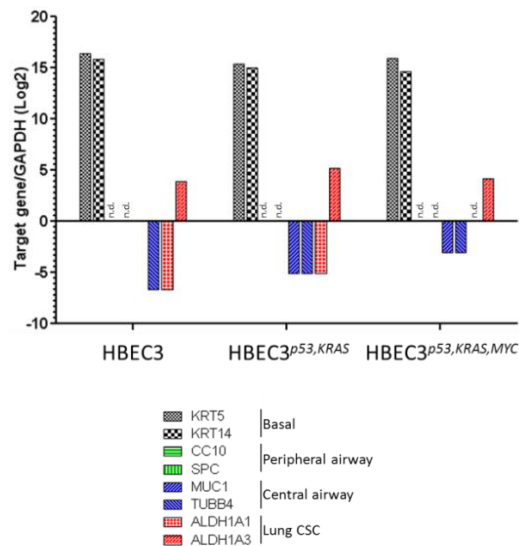

C

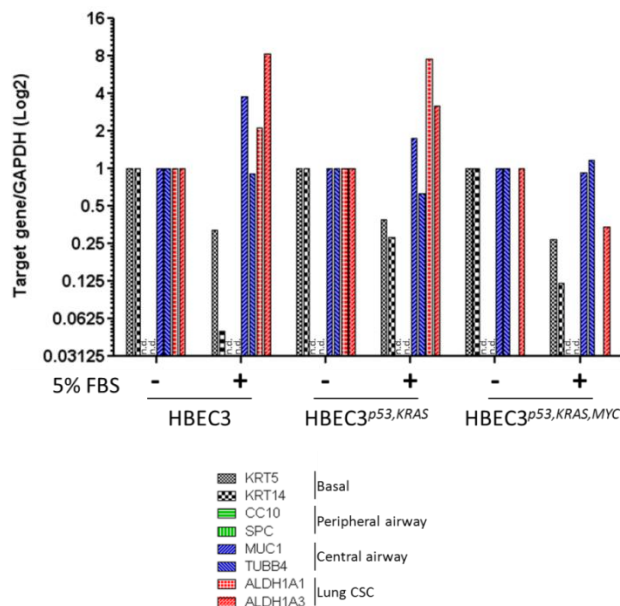

D

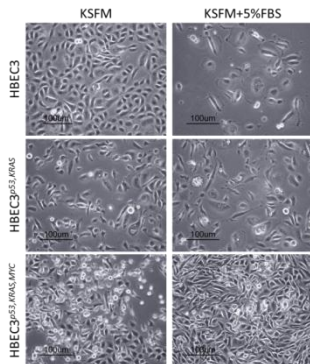

E

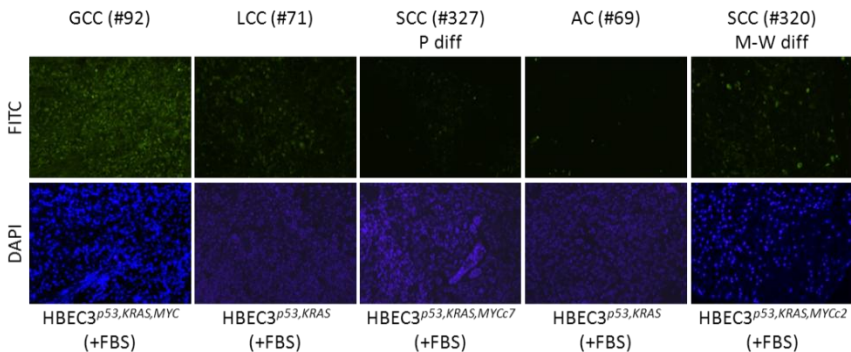

Supplementary Figure S4

A

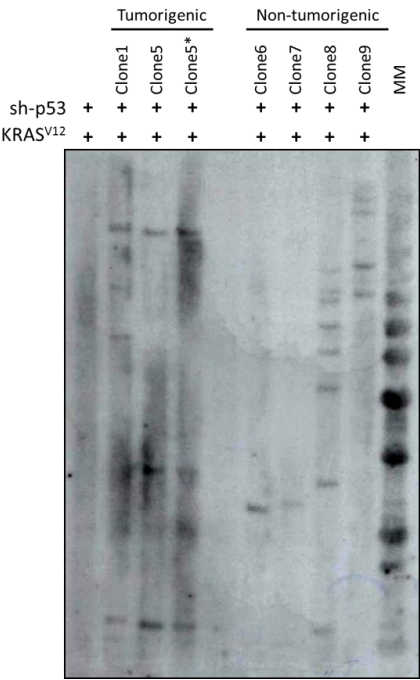

B

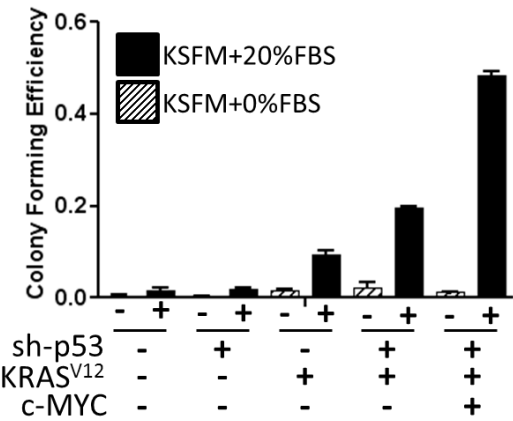

Supplementary Figure S5

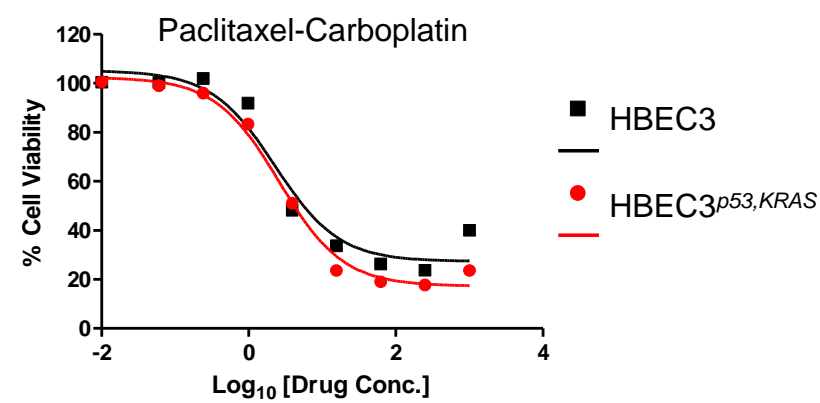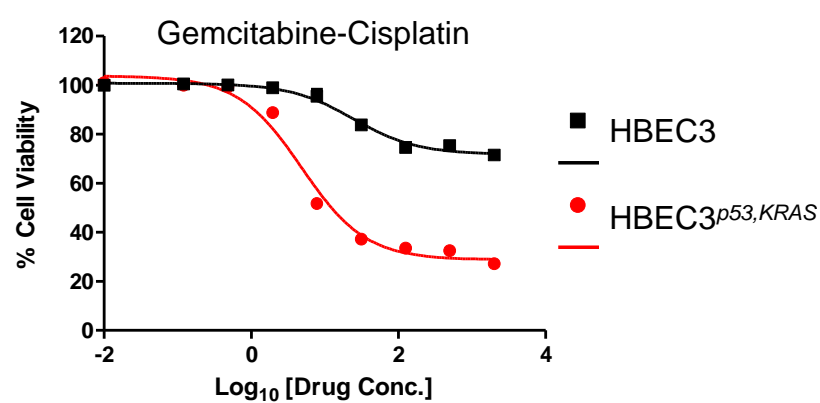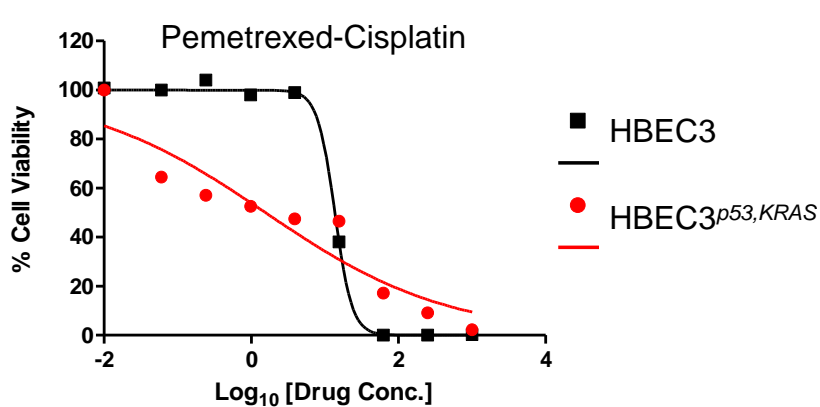



# Supplementary Figure S6

**Basal cell cycle profile of soft agar clones  
of HBEC3<sup>p53, KRAS</sup>**

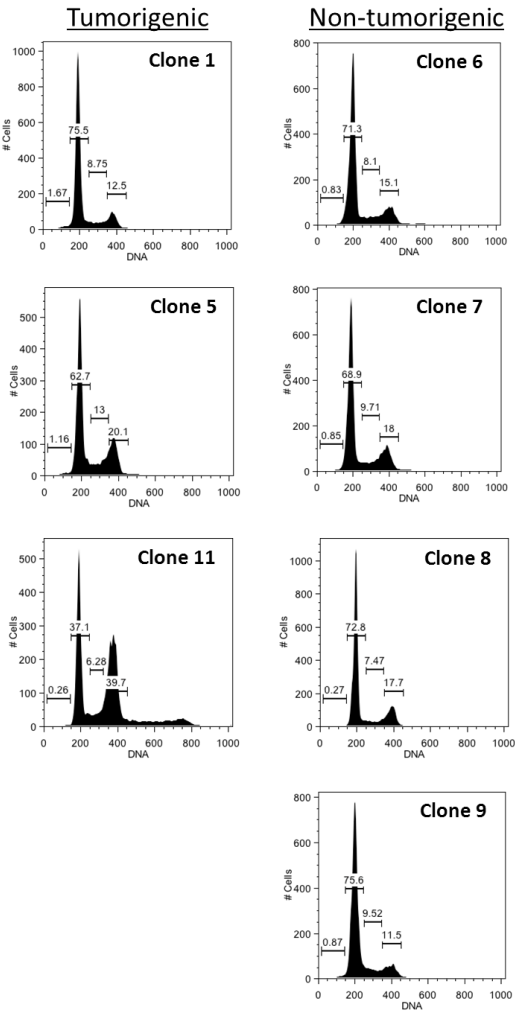

# Supplementary Figure S7

**A**

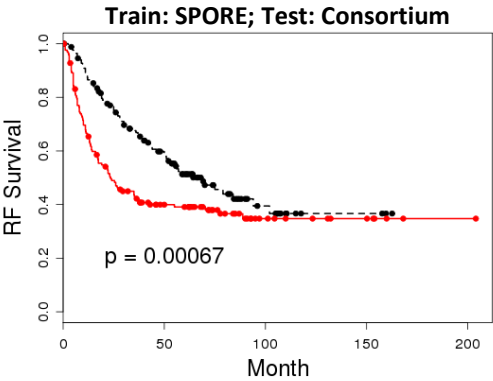

**B**

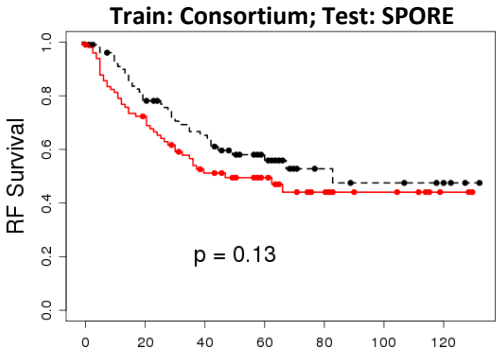

Supplementary Figure S8

Full-length blot of Figure 1A

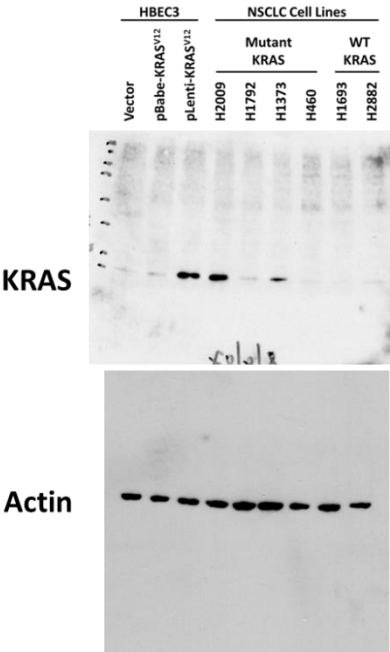

Full-length blot of Figure 1C

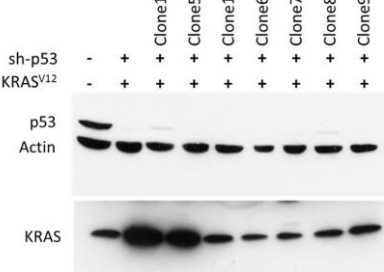

Full-length blot of Figure 1G

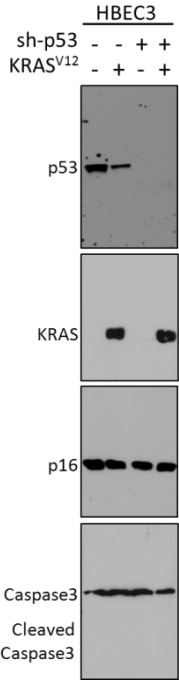

Full-length blot of Figure 4B

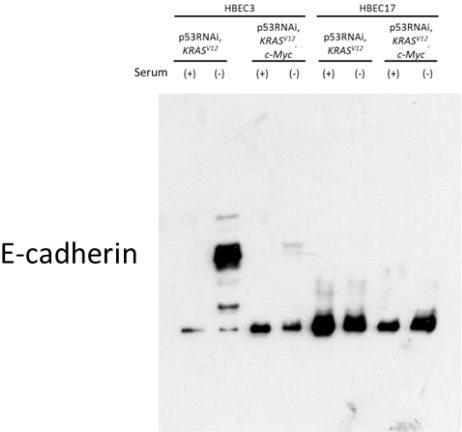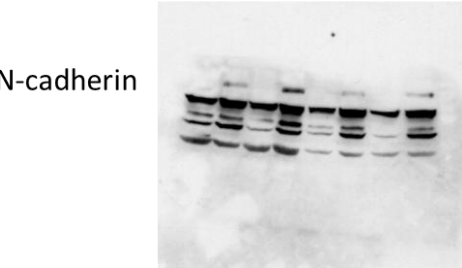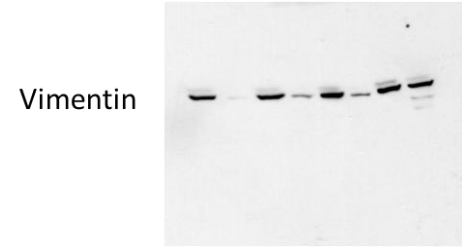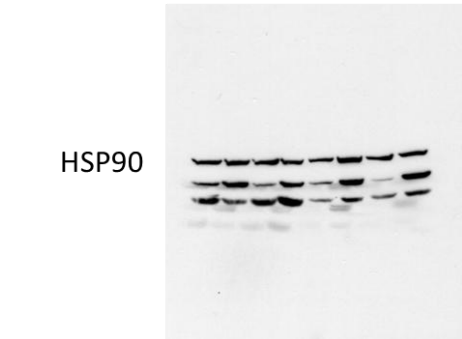

Full-length blot of Figure 2A

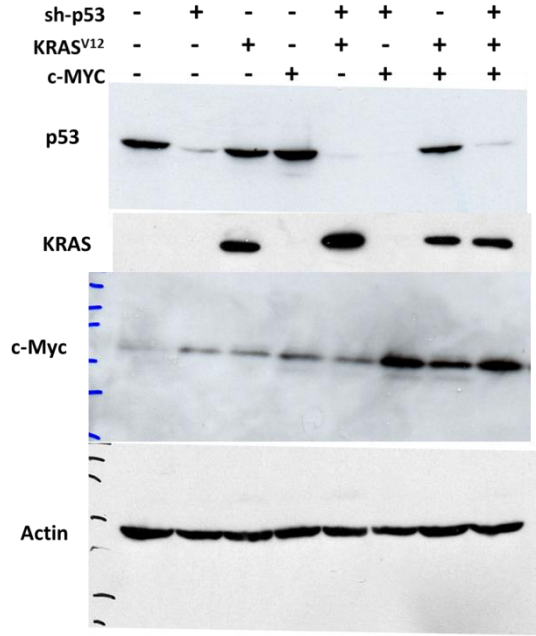

Full-length blot of Figure 5B

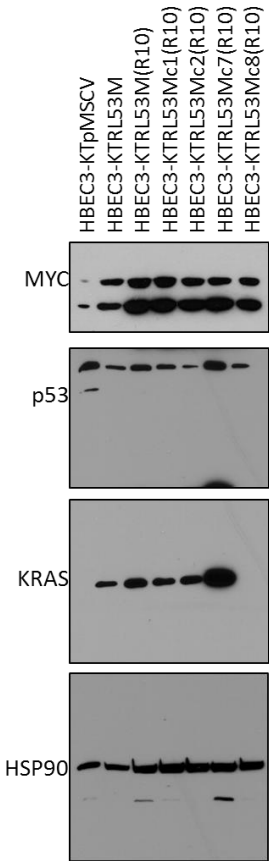

Supplement: NIHMS450692-supplement-1.pdf [file NIHMS450692-supplement-1.pdf]
